# Supplementary material
Source: publisher figshare collection journal article supplement (https://acs.figshare.com/ndownloader/files/22804988)
Supplement: Supplementary file 1 [file 22804988]

## Supporting information

### **A silver nanoparticles incorporated porous renewable film as low-cost bactericidal and antifouling filter for point-of-use water disinfection**

*Gongyan Liu,<sup>†,‡,§</sup> Jing Jiang,<sup>†,‡,§</sup> Ruiquan Yu,<sup>†,‡,§</sup> Hui Yan,<sup>†</sup> Ruifeng Liang<sup>\*,<sup>‡</sup></sup>*

<sup>†</sup>College of Biomass Science and Engineering, Sichuan University, Chengdu 610065, China.

<sup>‡</sup>National Engineering Laboratory of Clean Technology of Leather Manufacture, Sichuan University, Chengdu 610065, China.

<sup>§</sup>The Key Laboratory of Leather Chemistry and Engineering of Ministry of Education, Sichuan University, Chengdu 610065, China.

<sup>‡</sup>The State Key Laboratory of Hydraulic and Mountain River Engineering, Sichuan University, Chengdu 610065, China.

\*Corresponding Author, E-mail: [lrfcy@163.com](mailto:lrfcy@163.com)

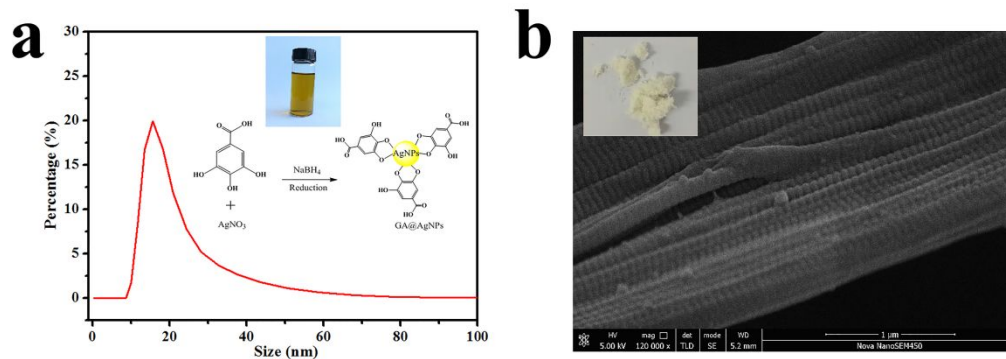

**Figure S1.** (a) Schematic illustration of the synthetic route of GA-stabilized AgNPs and particle size histograms of GA@AgNPs ; (b) SEM image of collagen fiber.

**Table S1.** Percentages of C=O, C-O, and O=C-O Bonds from XPS O1s Peak Fitting for CFs, Fe-CFs and GA@AgNPs-Fe-CFs

|                 | Bond percentage (%) |       |       |
|-----------------|---------------------|-------|-------|
|                 | C=O                 | C-O   | O=C-O |
| CFs             | 28.74               | 34.78 | 36.48 |
| Fe-CFs          | 28.20               | 37.54 | 34.26 |
| GA@AgNPs-Fe-CFs | 21.02               | 48.68 | 30.30 |

**Table S2.** The MIC and MBC values of GA@AgNPs solution against *E.coli* and *S. aureus*, respectively.

| <u>Antibiotic</u> | <u>Minimum Inhibitory</u>                               |                         | <u>Minimum Bactericidal</u>                             |                         |
|-------------------|---------------------------------------------------------|-------------------------|---------------------------------------------------------|-------------------------|
|                   | <u>Concentration (MIC, <math>\mu\text{g/mL}</math>)</u> |                         | <u>Concentration (MBC, <math>\mu\text{g/mL}</math>)</u> |                         |
|                   | <u><i>E.coli</i></u>                                    | <u><i>S. aureus</i></u> | <u><i>E.coli</i></u>                                    | <u><i>S. aureus</i></u> |
| <u>GA@AgNPs</u>   | <u>3.125</u>                                            | <u>6.25</u>             | <u>6.25</u>                                             | <u>12.5</u>             |

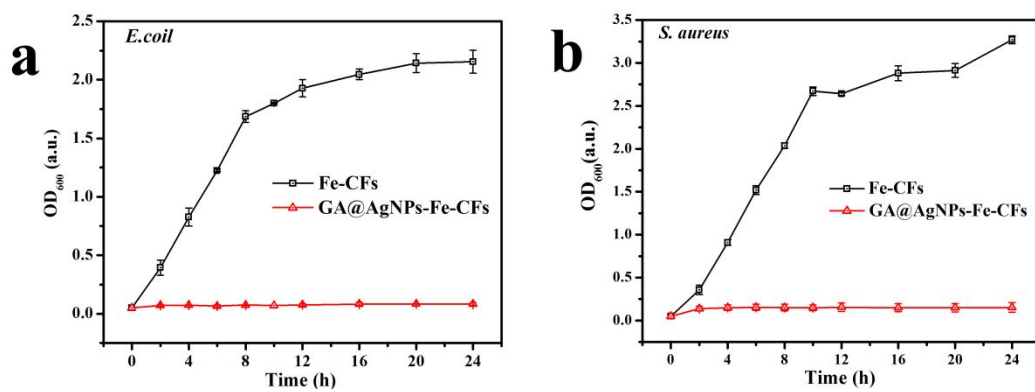

**Figure S2.** Growth curve of (a) *E. coli*, (b) *S. aureus*.

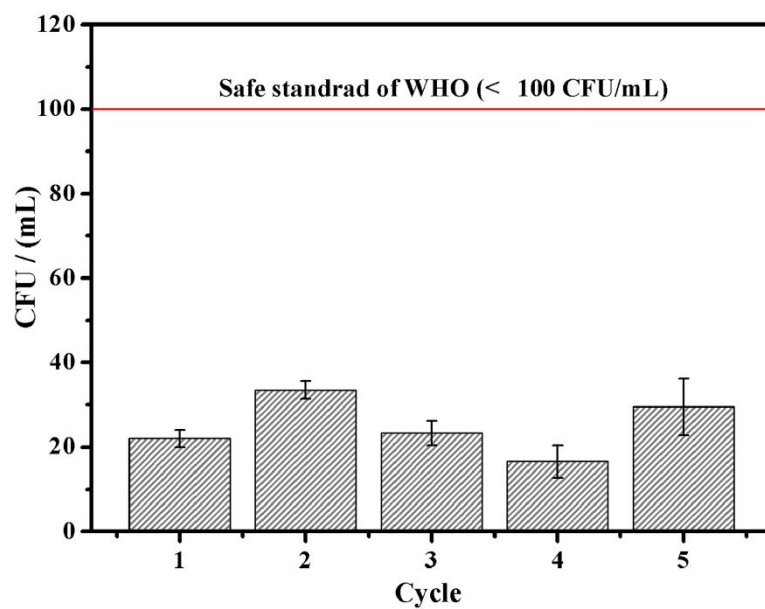

**Figure S3.** Bactericidal stability test of the GA@AgNPs-Fe-CFs film. Note that the experiment was done by analyzing every 200 mL of water. The total volume of the disinfected water was 1 L.
